# Supplementary material for: Nutrient Composition of Different Hazelnut Cultivars Grown in Germany
Source: PubMed Central journal article supplement (PMC7692035; doi:10.3390/foods9111596), 2020-11-03
Supplement: foods-09-01596-s001.pdf [file foods-09-01596-s001.pdf]

# Supplemental material to

## Nutrient Composition of Different Hazelnut Cultivars Grown in Germany

Anke Katharina Müller<sup>1,2</sup>, Ute Helms<sup>2,3</sup>, Carsten Rohrer<sup>1,2</sup>, Monika Möhler<sup>4</sup>, Frank Hellwig<sup>5</sup>, Michael Glei<sup>2,6</sup>, Tanja Schwerdtle<sup>7,8</sup>, Stefan Lorkowski<sup>1,2</sup>, Christine Dawczynski<sup>1,2,3\*</sup>

- <sup>1</sup> Department of Nutritional Biochemistry and Physiology, Institute of Nutritional Sciences, Friedrich Schiller University Jena, Dornburger Str. 25, 07743 Jena, Germany; anke.katharina.mueller@uni-jena.de; carsten.rohrer@uni-jena.de; stefan.lorkowski@uni-jena.de; christine.dawczynski@uni-jena.de
  - <sup>2</sup> Competence Cluster for Nutrition and Cardiovascular Health (nutriCARD), Halle-Jena-Leipzig, Dornburger Str. 25, 07743 Jena, Germany; ute.helms@uni-jena.de; michael.glei@uni-jena.de
  - <sup>3</sup> Junior Research Group Nutritional Concepts, Institute of Nutritional Sciences, Friedrich Schiller University Jena, Dornburger Str. 29, 07743 Jena, Germany;
  - <sup>4</sup> Department of Fruit Growing, Education & Research Institute of Horticulture, Leipziger Straße 75a, 99085 Erfurt, Germany; mon.mochler@lwg-erfurt.de
  - <sup>5</sup> Institute for Systematic Botany, Friedrich Schiller University Jena, Philosophenweg 16, 07743 Jena, Germany; frank.hellwig@uni-jena.de
  - <sup>6</sup> Department of Nutritional Toxicology, Institute of Nutritional Sciences, Friedrich Schiller University Jena, Dornburger Str. 24, 07743 Jena, Germany;
  - <sup>7</sup> Department of Food Chemistry, Institute of Nutritional Science, University of Potsdam, Arthur-Scheunert-Allee 114-116, 14558 Nuthetal, Germany; taschwer@uni-potsdam.de
  - <sup>8</sup> Competence Cluster Nutrition Research (NutriAct), Berlin-Potsdam, Arthur-Scheunert-Allee 114 – 116, 14558 Nuthetal, Germany
- \* Correspondence: christine.dawczynski@uni-jena.de; Tel.: +49-3641-9-49656

**Table S1 Agronomic data of and observations for the 15 varieties cultivated in Germany.**

| Variety                 | Vigorous growth | Stolon ungrafted | Yield            | Observations                                                            |
|-------------------------|-----------------|------------------|------------------|-------------------------------------------------------------------------|
| Emoa-1                  | Weak            | Minimal          | High, regular    | Oblong to round fruits, reliably good harvests, aromatic                |
| Webb's Prize Cob        | Weak            | Moderate         | High, regular    | Fruit does not fall out of the shell, aromatic                          |
| Gunslebener Zellernuss  | Moderate        | Minimal          | High, regular    | Oblong to round fruit, aromatic                                         |
| Barcelloner Zellernuss  | Moderate        | Moderate         | Very high        | Fruit quality poor, little flavor, shapeless cores, inconsistent        |
| Englische Riesen        | Moderate        | Minimal          | Moderate         | Very susceptible to gall mite infestation, not very aromatic            |
| Red Lambert             | Moderate        | Very strong      | Moderate         | Fruit does not fall out of the shell, aromatic, strong stolon formation |
| Corabel                 | Strong          | Moderate         | Moderate         | Inconsistent cores, often double, mostly 13 mm, aromatic                |
| Cosford                 | Strong          | Moderate         | Weak to moderate | Oblong, aromatic                                                        |
| Tonda di Giffoni        | Strong          | Moderate         | Variable         | Yield strongly dependent on the weather, mostly 14,5 mm                 |
| Ennis                   | Strong          | -                | Moderate         | Very large, prone to hazel drills, aromatic                             |
| Hall's Giant            | Very strong     | Moderate         | High, regular    | Uniform cores, aromatic                                                 |
| Merveille de Bollweiler | Very strong     | Moderate         | Moderate         | Oblong to round                                                         |
| Gustav Zeller           | Very strong     | Minimal          | High, regular    | Not very aromatic, mostly 12,5 mm                                       |
| Pauetet                 | Very strong     | Moderate         | Weak to moderate | Aromatic, small fruits                                                  |
| Juningia                | Strong          | Minimal          | Weak to moderate | Yield so far not satisfactory, aromatic                                 |
